# Supplementary material for: Design synthesis and photocatalytic activity of a novel lilac-like silver-vanadate hybrid solid based on dicyclic rings of [V4O12]4−with {Ag7}7+cluster
Source: Royal Society of Chemistry journal article supplement (doi:10.1039/c0cc02965c), 2010-11-11
Supplement: c0cc02965c.pdf [file c0cc02965c.pdf]

## Supporting Information

# Design Synthesis and Photocatalytic Activity of a Novel Lilac-like Silver-Vanadate Hybrid Solid Based on Dicyclic Rings of $[V_4O_{12}]^{4-}$ with $\{Ag_7\}^{7+}$ Cluster

Yan Hu, Fang Luo\* and Fangfang Dong

*Key Lab of Polyoxometalate Science of Ministry of Education, Department of  
Chemistry, Northeast Normal University, Changchun 130024,  
People's Republic of China*

\* Corresponding author.

E-mail: [luof746@nenu.edu.cn](mailto:luof746@nenu.edu.cn)

### **Materials and Measurements**

All reagents were obtained from commercial sources and used without further purification. The C, H and N elemental analysis were conducted on a Perkin-Elmer 240 C elemental analyzer. The FT-IR spectra were recorded from KBr pellets in the range 4000-400  $\text{cm}^{-1}$  on a Mattson Alpha-Contauri spectrometer. TGA was performed on a PYRIS DIAMOND in flowing  $\text{N}_2$  with a heating rate of 10  $^\circ\text{C min}^{-1}$ . X-ray powder diffraction (XRD) measurements of the as-prepared samples were performed on a Rigaku D/max-II B X-ray diffractometer with Cu-K $\alpha$  radiation ( $\lambda = 1.5418 \text{ \AA}$ ). UV-vis spectroscopy was performed on a U-3010 spectrophotometer (Hitachi, Japan). Energy Dispersive Spectrum (EDS) was used to determine the chemical composition of compound **1** on a S4800 Field-Emission Scanning Electron Microscope (Hitachi, Japan).

### **Crystallographic Analysis**

The intensity data were recorded on a Bruker APEX-II CCD system with Mo-K $\alpha$  radiation ( $\lambda = 0.71069 \text{ \AA}$ ). The crystal structure was solved by means of Direct Methods and refined employing full-matrix least squares on  $F^2$  using the *SHELXTL-97*<sup>1</sup> crystallographic software package. The ADDSYM program in PLATON<sup>2</sup> was used to check the space group of **1** and no other lower symmetry or unresolved disorder was found, indicating that the refinement of **1** was reasonable. All the non-hydrogen atoms were refined anisotropically, and the hydrogen atoms on the carbon and nitrogen atoms were located in a Fourier map and refined as riding on their C or N atoms. The detailed crystallographic data and structure refinement parameters for **1** are summarized in **Table S1**. These data can be obtained free of charge from The Cambridge Crystallographic Data Centre via [www.ccdc.cam.ac.uk/data\\_request/cif](http://www.ccdc.cam.ac.uk/data_request/cif).

### **Reference:**

- 1 G. M. Sheldrick, Shelxs-97, *Program for X-Ray Crystal Structure Solution*, University of Göttingen, Göttingen, Germany, 1997; G. M. Sheldrick, Shelxs-97, *Program for X-Ray Crystal Structure Refinement*, University of Göttingen, Göttingen, Germany, 1997.
- 2 A. L. Spek, PLATON, *A Multipurpose Crystallographic Tool*, Utrecht University, Utrecht, The Netherlands, 1998.

**Table S1.** Details of data collection and structure refinement for compound **1**.

|                                                                             |                                                                                                |
|-----------------------------------------------------------------------------|------------------------------------------------------------------------------------------------|
| Formula                                                                     | C <sub>50</sub> H <sub>74</sub> Ag <sub>8</sub> N <sub>20</sub> O <sub>26</sub> V <sub>8</sub> |
| <i>Mr</i>                                                                   | 2641.78                                                                                        |
| CCDC                                                                        | 759774                                                                                         |
| Cryst. Size, mm <sup>3</sup>                                                | 0.29 × 0.23 × 0.21                                                                             |
| Crystal system                                                              | Triclinic                                                                                      |
| space group                                                                 | <i>P</i> $\bar{1}$                                                                             |
| <i>a</i> , Å                                                                | 12.107(5)                                                                                      |
| <i>b</i> , Å                                                                | 12.154(5)                                                                                      |
| <i>c</i> , Å                                                                | 15.078(5)                                                                                      |
| $\alpha$ , deg                                                              | 83.821(5)                                                                                      |
| $\beta$ , deg                                                               | 68.816(5)                                                                                      |
| $\gamma$ , deg                                                              | 68.176(5)                                                                                      |
| <i>V</i> , Å <sup>3</sup>                                                   | 1919.6(13)                                                                                     |
| <i>Z</i>                                                                    | 1                                                                                              |
| <i>D</i> <sub>calcd</sub> , g cm <sup>-3</sup>                              | 2.285                                                                                          |
| <i>F</i> (000), e                                                           | 1282.0                                                                                         |
| <i>hkl</i> range                                                            | -14 ≤ <i>h</i> ≤ 14<br>-13 ≤ <i>k</i> ≤ 14<br>-8 ≤ <i>l</i> ≤ 17                               |
| $\theta$ range, deg                                                         | 2.12 - 25.00                                                                                   |
| Reflections collected/unique                                                | 9721 / 6685 [ <i>R</i> (int) = 0.0189]                                                         |
| Absorption coefficient, mm <sup>-1</sup>                                    | 2.997                                                                                          |
| Data/parameters                                                             | 6685 / 508                                                                                     |
| GoF ( <i>F</i> <sup>2</sup> )                                               | 1.096                                                                                          |
| <i>R</i> <sub>1</sub> / <i>wR</i> <sub>2</sub> [ <i>I</i> > 2σ( <i>I</i> )] | 0.0523 / 0.1279                                                                                |
| <i>R</i> <sub>1</sub> / <i>wR</i> <sub>2</sub> ( all data )                 | 0.0598 / 0.1320                                                                                |
| Largest diff. peak/hole, e Å <sup>-3</sup>                                  | 1.244/-1.203                                                                                   |

$$\text{GoF} = [\sum w(F_o^2 - F_c^2)^2 / (n_{\text{obs}} - n_{\text{param}})]^{1/2}; R_1 = \frac{\sum |F_o| - |F_c|}{\sum |F_o|}; wR_2 = [\sum w(F_o^2 - F_c^2)^2 / \sum w(F_o^2)^2]^{1/2}$$

**Table S2.** Selected bond lengths (Å) and angles (°) for compound **1**.

| Bond lengths (Å) |            |               |           |
|------------------|------------|---------------|-----------|
| Ag(1)-O(6)       | 2.437(6)   | Ag(1)-O(9)    | 2.459(6)  |
| Ag(1)-Ag(2)#1    | 3.0580(14) | Ag(2)-O(10)#1 | 2.195(5)  |
| Ag(2)-O(9)       | 2.204(5)   | Ag(2)-O(7)#1  | 2.536(7)  |
| Ag(3)-N(1)       | 2.133(7)   | Ag(3)-N(3)    | 2.138(7)  |
| Ag(3)-O(12)      | 2.549(6)   | Ag(4)-N(6)    | 2.123(7)  |
| C(23)-N(8)       | 1.350(11)  | Ag(5)-N(7)    | 2.091(7)  |
| Ag(5)-N(9)       | 2.094(7)   | C(22)-C(23)   | 1.341(13) |
| C(22)-N(7)       | 1.398(13)  | C(21)-N(7)    | 1.309(11) |
| C(21)-N(8)       | 1.338(10)  | C(11)-C(12)   | 1.343(14) |
| C(11)-N(3)       | 1.378(12)  | C(15)-C(14)   | 1.604(17) |
| C(24)-N(8)       | 1.464(10)  | C(24)-C(25)   | 1.522(11) |
| C(13)-C(14)      | 1.418(16)  | C(13)-N(4)    | 1.487(13) |
| C(4)-N(2)        | 1.491(16)  | C(8)-C(9)     | 1.498(14) |
| C(8)-N(5)        | 1.450(13)  | C(17)-N(9)    | 1.377(10) |
| C(16)-N(9)       | 1.319(11)  | C(16)-N(10)   | 1.336(11) |
| C(7)-C(6)        | 1.353(16)  | C(1)-N(1)     | 1.312(12) |
| C(1)-N(2)        | 1.338(14)  | N(1)-C(2)     | 1.365(12) |
| C(3)-N(2)        | 1.296(15)  | C(3)-C(2)     | 1.347(14) |
| N(5)-C(5)        | 1.335(11)  | N(5)-C(7)     | 1.362(14) |
| C(19)-N(10)      | 1.474(11)  | C(19)-C(20)   | 1.516(13) |
| C(18)-N(10)      | 1.361(10)  | C(18)-C(17)   | 1.341(12) |
| C(10)-N(3)       | 1.312(11)  | C(10)-N(4)    | 1.334(12) |
| C(12)-N(4)       | 1.351(13)  | C(6)-N(6)     | 1.355(12) |
| C(5)-N(6)        | 1.311(12)  | O(1)-V(2)     | 1.620(5)  |
| O(2)-V(1)        | 1.791(6)   | O(2)-V(2)     | 1.793(5)  |
| O(3)-V(1)        | 1.789(6)   | O(3)-V(4)     | 1.810(5)  |
| O(4)-V(3)        | 1.797(6)   | O(4)-V(4)     | 1.812(7)  |
| O(5)-V(3)        | 1.791(5)   | O(5)-V(2)     | 1.815(6)  |
| O(6)-V(2)        | 1.664(6)   | O(7)-V(4)     | 1.642(6)  |
| O(8)-V(3)        | 1.619(6)   | O(9)-V(3)     | 1.669(5)  |
| O(10)-V(1)       | 1.669(5)   | O(11)-V(4)    | 1.618(6)  |

|                      |            |                      |           |
|----------------------|------------|----------------------|-----------|
| O(12)-V(1)           | 1.639(5)   |                      |           |
| Angles (°)           |            |                      |           |
| O(6)-Ag(1)-O(9)      | 97.70(19)  | O(6)#1-Ag(1)-O(9)    | 82.30(19) |
| O(6)#1-Ag(1)-O(6)    | 180.0(2)   | O(9)-Ag(1)-O(9)#1    | 180.0(3)  |
| O(6)#1-Ag(1)-Ag(2)#1 | 124.05(15) | O(6)-Ag(1)-Ag(2)#1   | 55.95(15) |
| O(9)-Ag(1)-Ag(2)#1   | 134.49(13) | O(9)#1-Ag(1)-Ag(2)#1 | 45.51(13) |
| O(10)#1-Ag(2)-O(9)   | 174.0(2)   | O(10)#1-Ag(2)-O(7)#1 | 91.6(2)   |
| O(9)-Ag(2)-O(7)#1    | 94.3(2)    | N(1)-Ag(3)-N(3)      | 153.0(3)  |
| N(1)-Ag(3)-O(12)     | 99.9(2)    | N(3)-Ag(3)-O(12)     | 102.4(2)  |
| N(6)-Ag(4)-N(6)#2    | 180.0(1)   | N(7)-Ag(5)-N(9)      | 174.3(3)  |
| C(23)-C(22)-N(7)     | 109.2(8)   | N(7)-C(21)-N(8)      | 113.6(8)  |
| C(12)-C(11)-N(3)     | 108.3(8)   | C(22)-C(23)-N(8)     | 107.9(8)  |
| N(8)-C(24)-C(25)     | 111.8(7)   | C(14)-C(13)-N(4)     | 107.8(10) |
| N(5)-C(8)-C(9)       | 112.9(9)   | N(1)-C(1)-N(2)       | 111.3(10) |
| C(1)-N(1)-Ag(3)      | 125.4(7)   | C(2)-N(1)-Ag(3)      | 129.9(6)  |
| C(10)-N(3)-Ag(3)     | 129.6(7)   | C(11)-N(3)-Ag(3)     | 123.9(6)  |
| C(21)-N(7)-Ag(5)     | 128.8(6)   | C(22)-N(7)-Ag(5)     | 127.5(6)  |
| C(16)-N(9)-Ag(5)     | 131.0(6)   | C(17)-N(9)-Ag(5)     | 124.6(6)  |
| C(5)-N(6)-Ag(4)      | 126.4(6)   | C(6)-N(6)-Ag(4)      | 125.7(7)  |
| V(1)-O(2)-V(2)       | 134.4(3)   | V(1)-O(3)-V(4)       | 132.2(3)  |
| V(3)-O(4)-V(4)       | 133.9(4)   | V(3)-O(5)-V(2)       | 137.6(3)  |
| V(2)-O(6)-Ag(1)      | 125.4(3)   | V(4)-O(7)-Ag(2)#1    | 129.2(3)  |
| V(3)-O(9)-Ag(2)      | 166.3(4)   | V(3)-O(9)-Ag(1)      | 111.1(3)  |
| Ag(2)-O(9)-Ag(1)     | 81.77(19)  | V(1)-O(10)-Ag(2)#1   | 118.7(3)  |
| V(1)-O(12)-Ag(3)     | 136.1(3)   | O(12)-V(1)-O(10)     | 109.7(3)  |
| O(12)-V(1)-O(3)      | 108.7(3)   | O(10)-V(1)-O(3)      | 109.4(3)  |
| O(12)-V(1)-O(2)      | 109.1(3)   | O(10)-V(1)-O(2)      | 110.7(3)  |
| O(3)-V(1)-O(2)       | 109.3(3)   | O(1)-V(2)-O(6)       | 109.7(3)  |
| O(1)-V(2)-O(2)       | 109.3(3)   | O(6)-V(2)-O(2)       | 109.1(3)  |
| O(1)-V(2)-O(5)       | 108.8(3)   | O(6)-V(2)-O(5)       | 109.5(3)  |
| O(2)-V(2)-O(5)       | 110.4(3)   | O(8)-V(3)-O(9)       | 109.0(3)  |
| O(8)-V(3)-O(5)       | 108.6(3)   | O(9)-V(3)-O(5)       | 108.5(3)  |
| O(8)-V(3)-O(4)       | 109.7(3)   | O(9)-V(3)-O(4)       | 111.0(3)  |

|                 |          |                 |          |
|-----------------|----------|-----------------|----------|
| O(11)-V(4)-O(7) | 110.3(4) | O(11)-V(4)-O(3) | 108.9(3) |
| O(7)-V(4)-O(3)  | 108.5(3) | O(11)-V(4)-O(4) | 108.7(4) |
| O(7)-V(4)-O(4)  | 110.1(3) | O(3)-V(4)-O(4)  | 110.3(3) |

Symmetry transformations used to generate equivalent atoms: #1 -x+2,-y,-z; #2 -x+1,-y+1,-z+1;  
#3 x+1,y-1,z ; #4 x-1,y+1,z; #5 -x+3,-y-1,-z; #6 -x+1,-y,-z; #7 -x+2,-y,-z+1

### *IR spectrum of compound 1*

The IR spectrum has strong bands at 906.3939 and 887.1089  $\text{cm}^{-1}$  assigning to the terminal V-O stretching. The bands at 757.8996 and 653.7607  $\text{cm}^{-1}$  are due to the symmetrical and asymmetrical V-O-V stretching. The bands at 1402.018, 1442.516, 1515.799 and 1639.223  $\text{cm}^{-1}$  are the characteristic vibrations of bbi ligand.

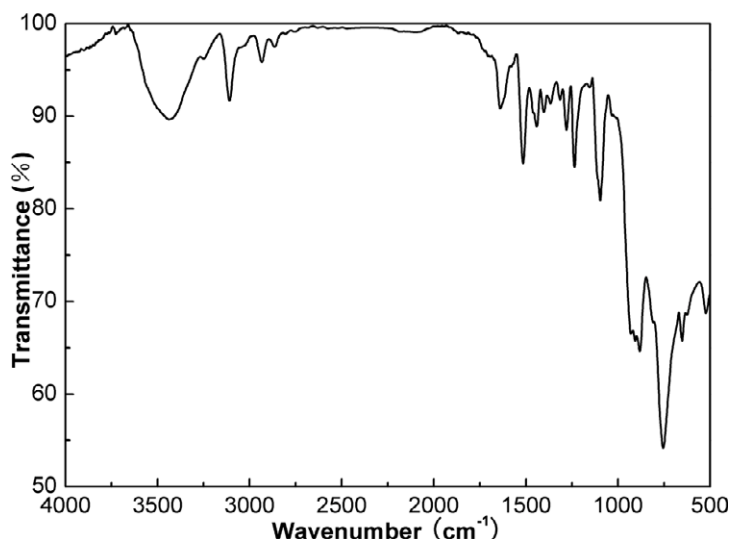

**Fig. S1** IR spectrum of compound 1

### *TG curve of compound 1*

TGA was performed in the range of 50-1000 °C on a Perkin-Elmer TG-7 analyzer in flowing  $\text{N}_2$  with a heating rate of 10  $^\circ\text{C}\cdot\text{min}^{-1}$ . The TG curve of compound 1 shows four weight-loss steps in the temperature range of 50-1000 °C. The first weight-loss of 1.45% (calcd 1.36%) in the temperature range of 50-190 °C, is corresponding to the loss of two free water molecules per formula unit. A second weight-loss of 11.85% (calcd 11.29%) is attributed to the loss of the free  $[\text{Ag}(\text{bbi})]^{+\infty}$  chain, with the temperature range of 190-284 °C. The last two weight-loss total of 28.80% (calcd 28.69%) in the temperature range of 284-536 °C, is likely corresponding to the reduction of  $\text{Ag}^+$  to  $\text{Ag}(\text{s})$  and the loss of  $\text{Ag-bbi}$

, then the construction based on  $[\text{V}_4\text{O}_{12}]^{4-}$  disintegrated. It took on ascend trend of the curve in the temperature range of 650-1000 °C, because the decomposition products were oxidized again at high temperature.

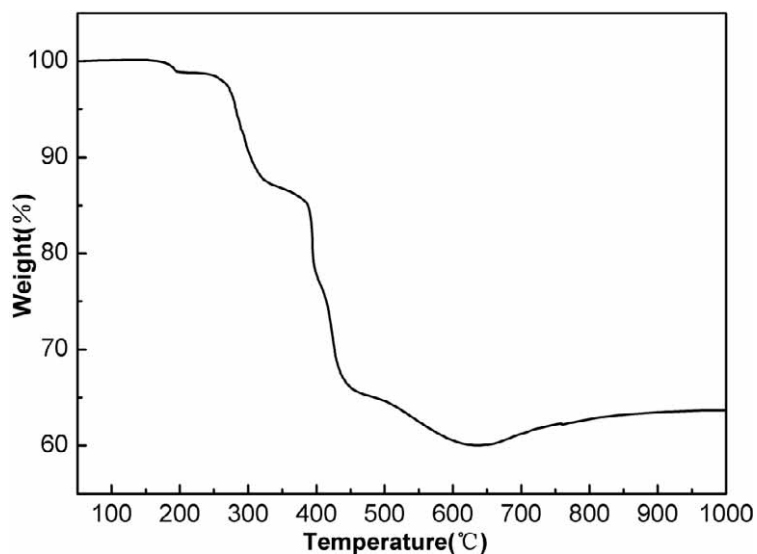

Fig. S2 TG curves of compound 1.

*Photocatalytic activity:*

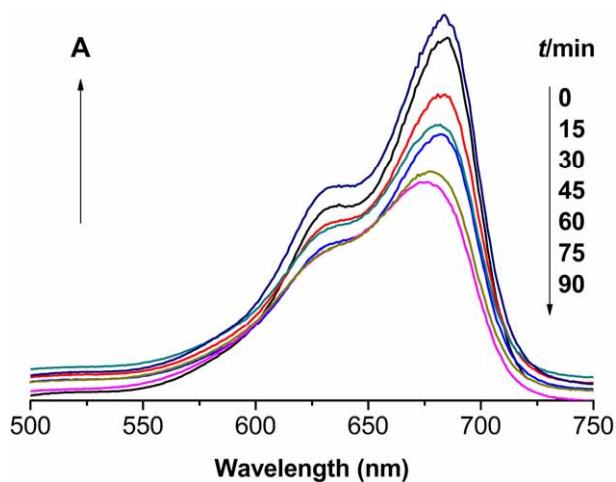

Fig. S3 Absorption spectra of the MB solution during the decomposition reaction under UV light irradiation with the use of  $\{[\text{Ag}(\text{bipy})]_3[\text{HSiW}_{12}\text{O}_{40}]\}[\text{bipy}]$  (abbreviated as  $\text{Ag}_3+\text{SiW}_{12}$ ).

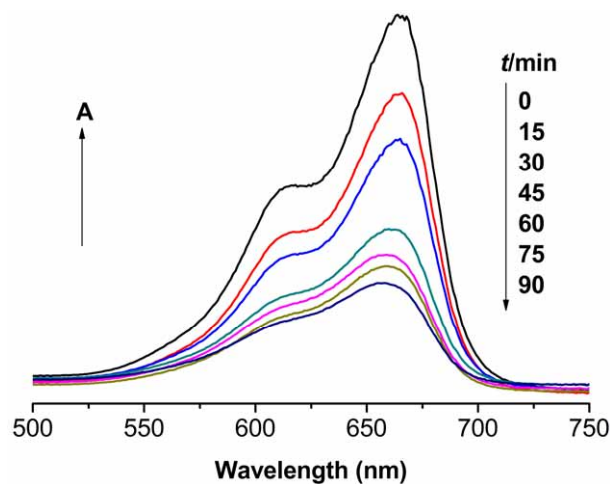

**Fig. S4** Absorption spectra of the MB solution during the decomposition reaction under UV light irradiation with the use of  $[V_4O_{10}(\text{phen})_2]$  (abbreviated as  $V_4$ ).

### *PXRD of compound 1*

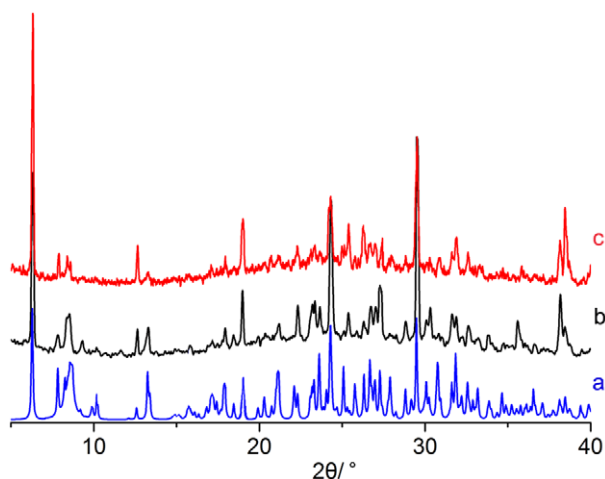

**Fig. S5** PXRD patterns of compound **1**: blue a, simulated; black b, as-synthesized; red c, after photocatalytic reaction.

### *The recycle experiment of compound 1:*

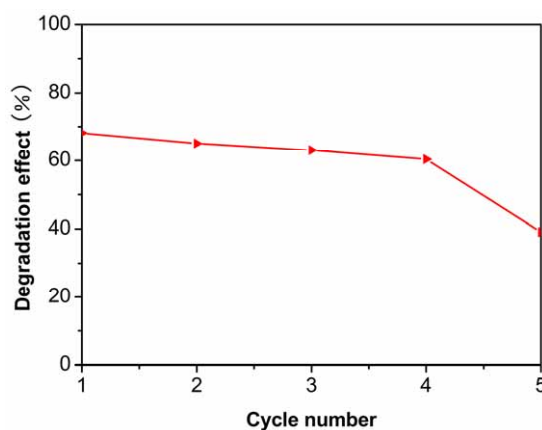

**Fig. S6** Cycling runs of **1** in the degradation of MB solution (90 ml of  $10 \text{ mg L}^{-1}$ ).



**EDS of compound 1:**

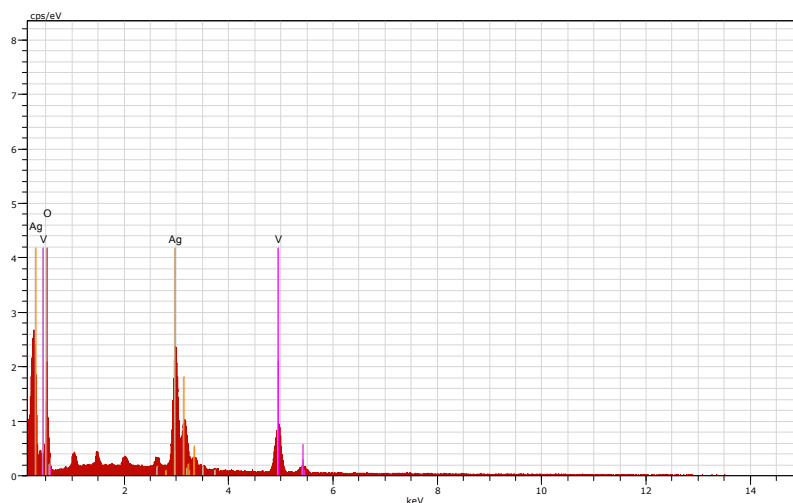

**Fig. S7** Energy Dispersive Spectrum (EDS) of compound 1.

**Table S3.** The data of EDS analysis (HV:15.0kV, Puls th.:2.06kcps)

| El | AN     | Series   | unn.<br>[wt.%] | C norm.<br>[wt.%] | C Atom.<br>[at.%] | C Error<br>[%] |
|----|--------|----------|----------------|-------------------|-------------------|----------------|
| O  | 8      | K-series | 21.62          | 26.24             | 63.83             | 26.4           |
| V  | 23     | K-series | 19.54          | 23.71             | 18.12             | 0.6            |
| Ag | 47     | L-series | 41.23          | 50.05             | 18.06             | 1.3            |
|    | Total: |          | 82.39          | 100.00            | 100.00            |                |
